# Supplementary material for: A practical method for the synthesis of small peptides using DCC and HOBt as activators in H2O–THF while avoiding the use of protecting groups
Source: Royal Society of Chemistry journal article supplement (doi:10.1039/d4ra07847k), 2024-01-01
Supplement: d4ra07847k1.pdf [file d4ra07847k1.pdf]

## **A practical method for the synthesis of small peptides using DCC and HOBt as activators in H<sub>2</sub>O-THF while avoiding the use of protecting groups.**

Karina Herrera-Guzman,<sup>a</sup> Miguel Ángel Jaime-Vasconcelos,<sup>a</sup> Eréndira Torales,<sup>a</sup> Itzel Chacón,<sup>a</sup> Rubén Gaviño,<sup>a</sup> Eréndira García-Ríos,<sup>a</sup> Jorge Cárdenas,<sup>\*a</sup> José A. Morales-Serna<sup>\*b</sup>

<sup>a</sup> Instituto de Química, Universidad Nacional Autónoma de México, Circuito Exterior, Ciudad Universitaria, Ciudad de México, 04510, México.

<sup>b</sup> Centro de Investigaciones Científicas, Instituto de Química Aplicada, Universidad del Papaloapan, Tuxtepec, Oaxaca, 68301, México. E-mail: joseantonio.moralesserna@gmail.com.

### **Table of contents**

|                                                    |     |
|----------------------------------------------------|-----|
| 1. Characterisation data                           | S2  |
| 2. NMR spectrum of compounds 9-13                  | S5  |
| 3. NMR spectrum of intermediates 18, 20, 21 and 22 | S10 |
| 4. NMR Spectrum of Sansalvamide A                  | S11 |
| 5. ESI-MS of Sansalvamide A                        | S13 |
| 6. HPLC of Sansalvamide A                          | S13 |
| 7. References                                      | S13 |

**1. Characterisation data****Boc-Pro-Phe-OH 6<sup>1</sup>**

<sup>1</sup>H NMR (CDCl<sub>3</sub>, 300 MHz): δ 8.85 (1H, brs), 7.44 (3H, m), 7.23 (2H, m), 6.61 (1H, br s), 4.82 (1H, m), 4.21 (1H, m), 3.29 (2H, m), 3.27 (1H, dd, *J* = 13.8, 6.4 Hz), 3.06 (1H, dd, *J* = 13.8, 4.3 Hz), 1.98 (2H, m), 1.58 (2H, m), 1.38 (9H, s). <sup>13</sup>C NMR (CDCl<sub>3</sub>, 300MHz): δ 174.0, 173.2, 171.5, 155.4, 136.1, 129.3, 128.2, 127.1, 81.7, 61.2, 60.4, 52.8, 46.9, 37.6, 30.9, 28.3, 23.8.

**Boc-Pro-Phe-OMe 8<sup>1</sup>**

<sup>1</sup>H NMR (CDCl<sub>3</sub>, 300 MHz): δ 7.24 (3H, m), 7.09 (2H, m), 6.46 (1H, brs), 4.86 (1H, m), 4.23 (1H, m), 3.72 (3H, s), 3.28 (2H, m), 3.19 (1H, dd, *J* = 14.1, 5.7 Hz), 3.00 (1H, dd, *J* = 14.1, 6.9 Hz), 1.92 (2H, m), 1.62 (2H, m), 1.42 (9H, s). <sup>13</sup>C NMR (CDCl<sub>3</sub>, 300MHz): δ 171.9, 171.7, 136.0, 129.2, 128.5, 127.0, 80.7, 60.4, 52.9, 52.2, 46.9, 38.2, 30.3, 28.3, 23.9.

**Boc-Pro-Gly-OH 9<sup>2</sup>**

<sup>1</sup>H NMR (CDCl<sub>3</sub>, 400 MHz): δ 10.30 (1H, brs), 7.71 (1H, brs), 7.36 (1H, brs), 4.29 (1H, m), 4.08 (2H, dd, *J* = 18.1, 5.1 Hz), 3.44 (2H, m), 2.36-1.75 (4H, m), 1.40 (9H, s). <sup>13</sup>C NMR (CDCl<sub>3</sub>, 101 MHz) δ 174.54, 156.57, 139.28, 128.57, 127.19, 126.53, 116.37, 111.89, 81.55, 60.18, 59.28, 59.10, 47.13, 41.57, 31.15, 30.91, 28.46, 28.38, 24.38, 23.72.

**Boc-Pro-Pro-OH 10<sup>3</sup>**

<sup>1</sup>H NMR (CDCl<sub>3</sub>, 300 MHz): δ 12.8 (1H, brs), 7.72 (2H brs), 7.36 (2H, brs), 4.66-4.15 (2H, m), 3.82-3.25 (4H, m), 2.36-1.65 (8H, m), 1.37 (9H, brs). <sup>13</sup>C NMR (75 MHz, CDCl<sub>3</sub>) δ 173.8, 173.5, 173.0, 172.8, 154.8, 153.9, 138.9, 128.5, 127.0, 127.0, 126.3, 116.0, 111.7, 80.1, 59.4, 59.0, 57.8, 46.9, 29.8, 29.0, 28.3, 28.2, 24.8, 24.0, 23.5.

**Boc-Pro-Thr-OH 11**

<sup>1</sup>H NMR (CDCl<sub>3</sub>, 300 MHz): δ 9.73 (1H, brs), 7.76 (2H, brs), 7.39 (2H, brs), 4.55 (1H, d, *J* = 8.29 Hz), 4.38 (2H, m), 3.58-3.30 (2H, m), 2.32-1.76 (4H, m), 1.42 (9H, s), 1.19 (3H, d, *J* = 6.4 Hz). <sup>13</sup>C NMR (75 MHz, CDCl<sub>3</sub>) δ 173.7, 172.8, 155.4, 139.1, 128.5, 127.0, 126.4, 116.2, 111.7, 81.1, 67.6, 60.2, 57.4, 47.0, 29.5, 28.2, 24.1, 19.4.

**Boc-Pro-Leu-OH 12<sup>4</sup>**

<sup>1</sup>H NMR (CDCl<sub>3</sub>, 300 MHz): δ 12.35 (brs), 7.75 (1H, s), 7.38 (1H, m), 4.54 (1H, brs), 4.31 (1H, brs), 3.41 (2H, m), 2.16 (2H, m), 1.85 (2H, m), 1.64 (3H, m), 1.41 (9H, s), 0.90 (6H, d, *J* = 4.8 Hz). <sup>13</sup>C NMR (75

## Supporting Information

MHz, CDCl<sub>3</sub>) δ 175.5, 172.8, 155.4, 139.3, 128.5, 126.8, 126.4, 116.3, 111.6, 80.9, 60.3, 58.9, 50.8, 46.9, 41.0, 28.1, 24.8, 24.0, 22.7, 21.6.

### **Boc-Pro-Trp-OH 13**

<sup>1</sup>H NMR (CDCl<sub>3</sub>, 300 MHz): δ 10.23 (1H brs), 8.73 (1H, s), 7.72 (1H, dd, *J* = 7.2, 0.2 Hz), 7.53 (1, d, *J* = 7.3, 0.3 Hz), 7.37 (1H, brs), 7.28 (1, ddd, *J* = 7.0, 1.4, 0.2 Hz), 7.09 (1, ddd, *J* = 7.0, 1.2, 0.3 Hz), 7.05-6.98 (3H, brs), 4.87 (1H, ddd, *J* = 5.8, 5.2, 0.4 Hz), 4.19 (1H, m), 3.38 (1, dd, *J* = 14.8, 5.2 Hz), 3.28 (1, dd, *J* = 14.8, 5.8 Hz), 3.24 (2H, m), 1.95 (2H, m), 1.63 (2H, m), 1.45 (2H, m), 1.30 (9H, s). <sup>13</sup>C NMR (75 MHz, CDCl<sub>3</sub>) δ 173.9, 155.3, 138.6, 136.2, 128.6, 127.7, 127.5, 126.5, 123.4, 121.9, 119.4, 118.2, 115.8, 111.9, 111.4, 109.4, 81.2, 60.4, 59.1, 53.2, 46.9, 28.3, 28.1, 27.1.

### **Boc-Pro-Phe-Gly-OH 14**

<sup>1</sup>H NMR (CDCl<sub>3</sub>, 300 MHz): δ 8.13 (1H, brs), 7.48 (3H, m), 7.31 (2H, m), 6.89 (1H, brs), 4.82 (1H, dd, *J* = 14.4, 7.4 Hz), 4.17 (1H, m), 4.12 (1H, d, *J* = 7.2 Hz), 4.02 (1H, d, *J* = 7.2 Hz), 3.90 (1H, brs), 3.28 (2H, m), 3.25 (1H, dd, *J* = 13.9, 6.4 Hz), 3.16 (1H, dd, *J* = 13.9, 4.5 Hz), 1.92 (2H, m), 1.78 (2H, m), 1.38 (9H, s).

### **Boc-Pro-Phe-Gly-Pro-OH 15.**

<sup>1</sup>H NMR (CDCl<sub>3</sub>, 300 MHz): δ 8.26 (1H, brs), 7.49 (3H, m), 7.28 (2H, m), 6.86 (1H, brs), 4.80 (1H, dd, *J* = 14.5, 7.3 Hz), 4.51 (1H, dd, *J* = 13.8, 6.9 Hz), 4.18 (1H, m), 4.15 (1H, d, *J* = 7.2 Hz), 4.08 (1H, d, *J* = 7.2 Hz), 4.03 (1H, m), 3.57 (2H, m), 3.27 (2H, m), 2.98 (2H, m), 2.25 (2H, m), 2.10 (2H, m), 1.91 (2H, m), 1.72 (2H, m), 1.38 (9H, s).

### **O-Leu-Val-OH-18**

<sup>1</sup>H NMR (CDCl<sub>3</sub>, 300 MHz): δ 7.25 (1H, d, *J* = 8.8 Hz), 6.12 (2H, s), 4.44 (1H, dd, *J* = 8.5, 4.5), 4.19 (1H, dd, *J* = 9.1, 3.8 Hz), 2.23 (1H, hecctd, *J* = 6.8, 4.7Hz), 1.82 (1H, nan, *J* = 6.5), 1.61 (1H, ddd, *J* = 13.9, 9.5, 6.8 Hz), 1.56 (1H, ddd, *J* = 13.8, 6.6, 3.9 Hz), 0.98 (6H, d, *J* = 6.9 Hz), 0.95 (6H, d, *J* = 6.9 Hz).

### **O-Leu-Val-Leu-OH-20**

<sup>1</sup>H NMR (CDCl<sub>3</sub>, 300 MHz): δ 7.36 (1H, d, *J* = 9.2 Hz), 7.28 (1H, d, *J* = 7.6 Hz), 4.46 (1H, ddd, *J* = 9.1, 3.2, 7.8, 5.1 Hz), 4.34 (1H, dd, *J* = 8.9, 6.1 Hz), 4.10 (1H, dd, *J* = 9.8, 3.4 Hz), 2.2 (1H, oct, *J* = 6.2 Hz), 1.86 (1H, nan, *J* = 6.8 Hz), 1.72-1.43 (5H, m), 0.95 (3H, d, *J* = 6.7 Hz), 0.94 (3H, d, *J* = 6.6 Hz), 0.94 (6H, d, *J* = 6.4 Hz), 0.93 (3H, d, *J* = 6.5 Hz), 0.9 (3H, d, *J* = 6.9 Hz).

## Supporting Information

### O-Leu-Val-Leu-Phe-OH 21

$^1\text{H NMR}$  ( $\text{CDCl}_3$ , 300 MHz):  $\delta$  7.41 (1H, d,  $J = 8.5$  Hz), 7.32 (1H, d,  $J = 9.7$  Hz), 7.28-7.17 (5H, m), 7.08 (1H, d,  $J = 7.7$  Hz), 5.68 (2H, s, br), 4.73 (1H, ddd,  $J = 7.4, 6.5, 5.3$  Hz), 4.39 (1H, td,  $J = 8.5, 5.6$  Hz), 4.32 (1H, dd,  $J = 9.2, 6.1$  Hz), 4.10 (1H, dd,  $J = 9.6, 3.4$  Hz), 3.18 (1H, dd,  $J = 14.2, 5.6$  Hz), 3.05 (1H, dd,  $J = 14.2, 6.4$  Hz), 2.16 (1H, oct,  $J = 6.3$  Hz), 1.6-1.5 (5H, m), 1.86 (1H, hecct, 1H,  $J = 6.6, 2.3$  Hz), 0.92 (3H, d,  $J = 6.6$  Hz), 0.91 (6H, d,  $J = 6.6$  Hz), 0.90 (6H, d,  $J = 6.3$  Hz), 0.85 (3H, d,  $J = 6.6$  Hz).

### O-Leu-Va-lLeu-Phe-Leu-OH 22

$^1\text{H NMR}$  ( $\text{CD}_3\text{OD}$ , 300 MHz):  $\delta$  8.13 (1H d,  $J = 8.4$  Hz), 8.01 (1H, d,  $J = 7.6$  Hz), 7.8 (1H, d,  $J = 8.1$  Hz), 7.5 (1H, d,  $J = 9.1$  Hz), 7.24-7.13 (5H, m), 4.58 (1H, td,  $J = 8.5, 4.6$  Hz), 4.25 (ddd, 1H,  $J = 7.8, 6.8, 6.5$  Hz), 4.25 (1H, ddd,  $J = 7.6, 6.8, 6.5$  Hz), 4.17 (1H, dd,  $J = 8.9, 2.6$  Hz), 3.84 (1H, td,  $J = 8.8, 4.3$  Hz), 3.03 (1H, dd,  $J = 14.2, 4.8$  Hz), 2.78 (1H, dd,  $J = 14.1, 8.6$  Hz), 1.87 (1H, nan,  $J = 6.6$  Hz), 1.72 (1H, oct,  $J = 6.6$  Hz), 1.58 (3H, oct,  $J = 6.5$  Hz), 1.52-1.34 (5H, m), 0.84 (6H, d,  $J = 6.6$  Hz), 0.83 (6H, d,  $J = 6.6$  Hz), 0.82 (3H, d,  $J = 6.6$  Hz), 0.78 (3H, d,  $J = 6.6$  Hz), 0.75 (3H, d,  $J = 6.6$  Hz), 0.70 (3H, d,  $J = 6.6$  Hz).

## 2. NMR spectrum of compounds 9-13

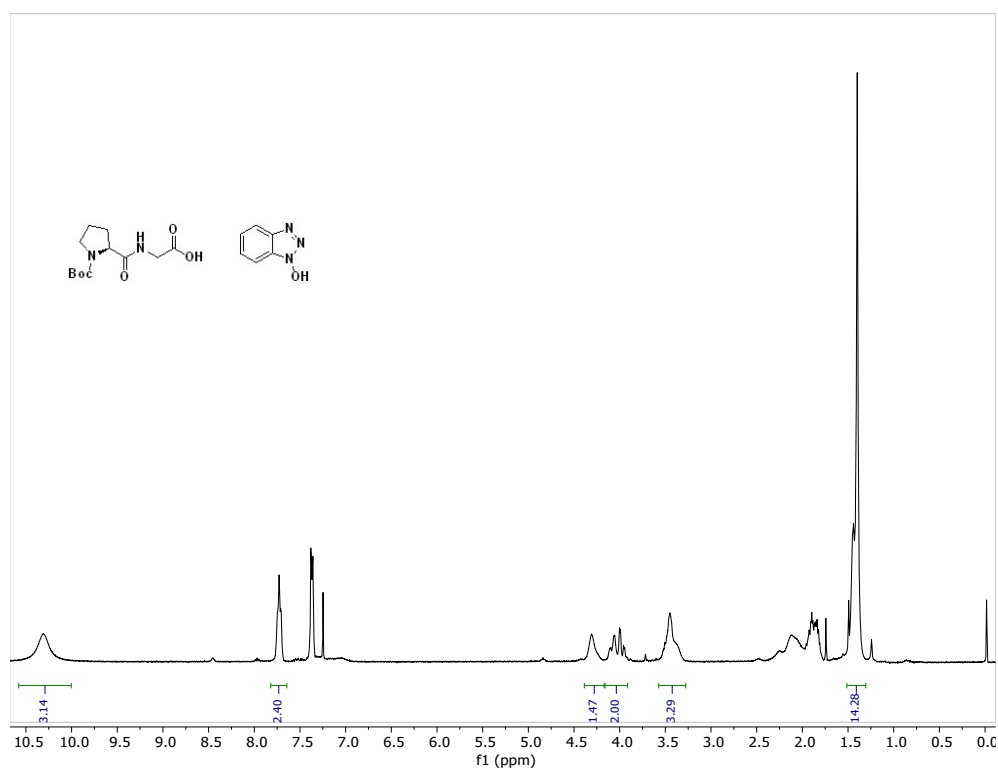<sup>1</sup>H NMR of 9 + HOBt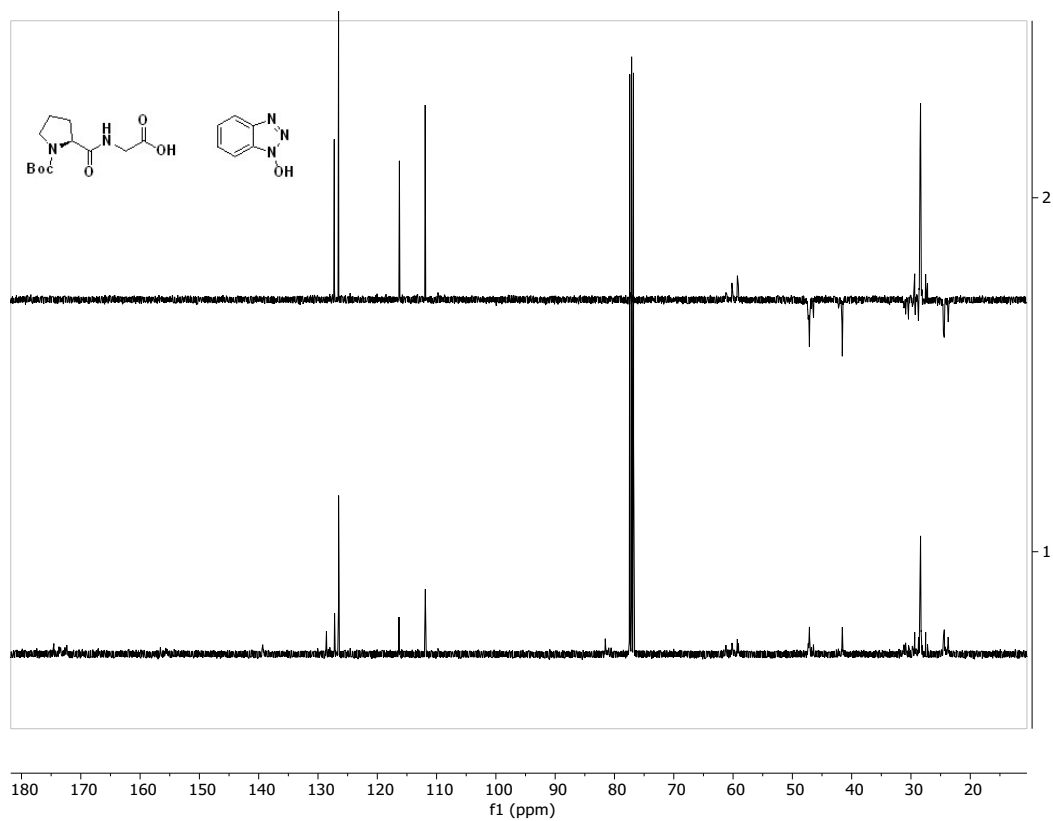<sup>13</sup>C and DEPT NMR of 9 + HOBt

# Supporting Information

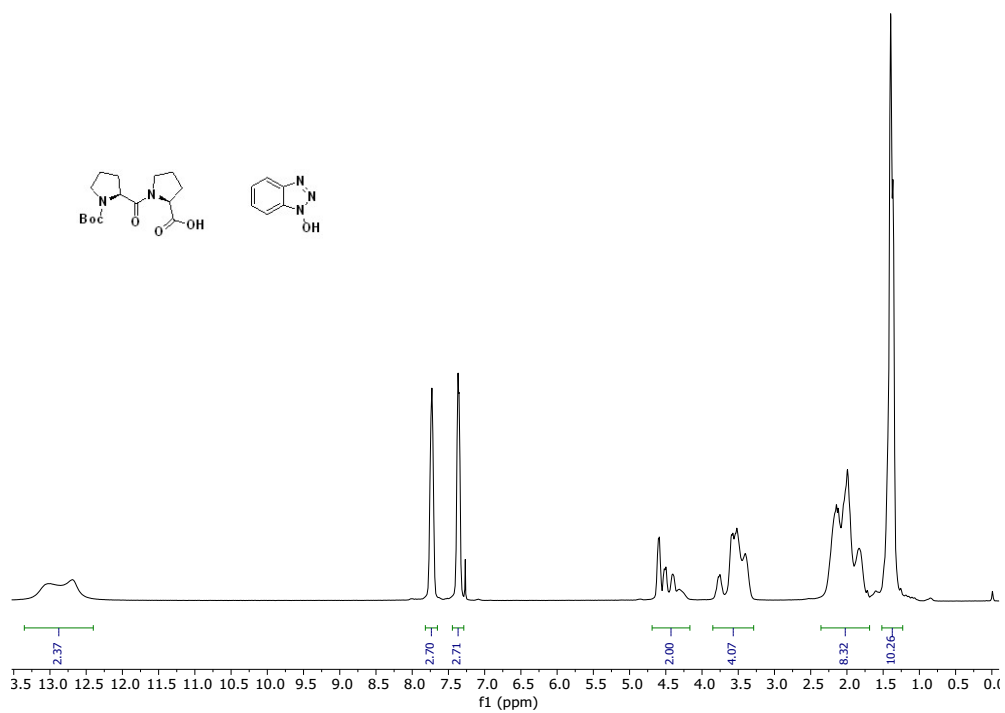

**<sup>1</sup>H NMR of 10 + HOBt**

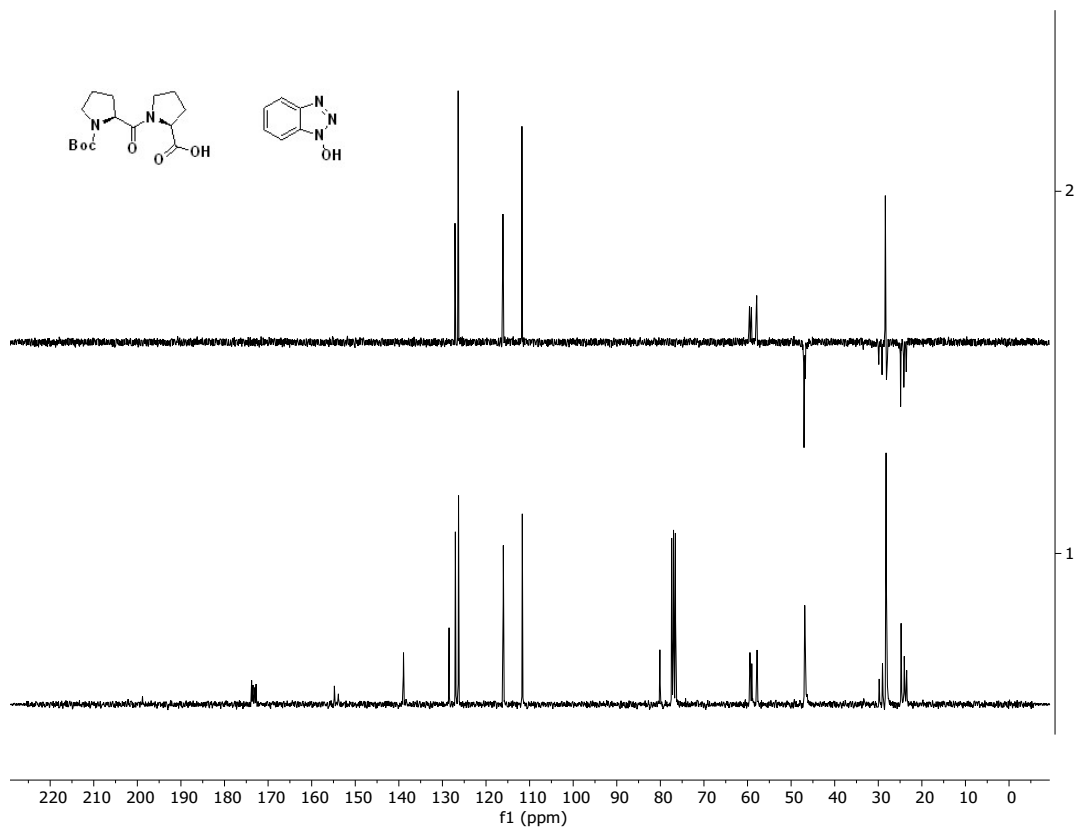

**<sup>13</sup>C and DEPT NMR of 10 + HOBt**

# Supporting Information

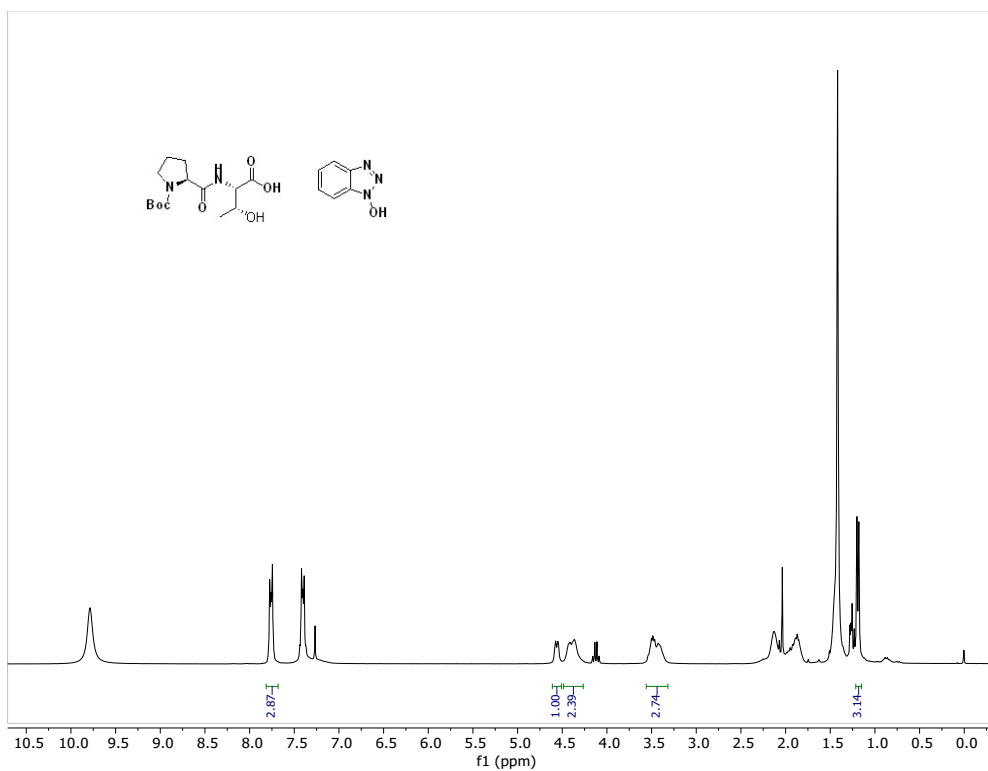

**<sup>1</sup>H NMR of 11 + HOBt**

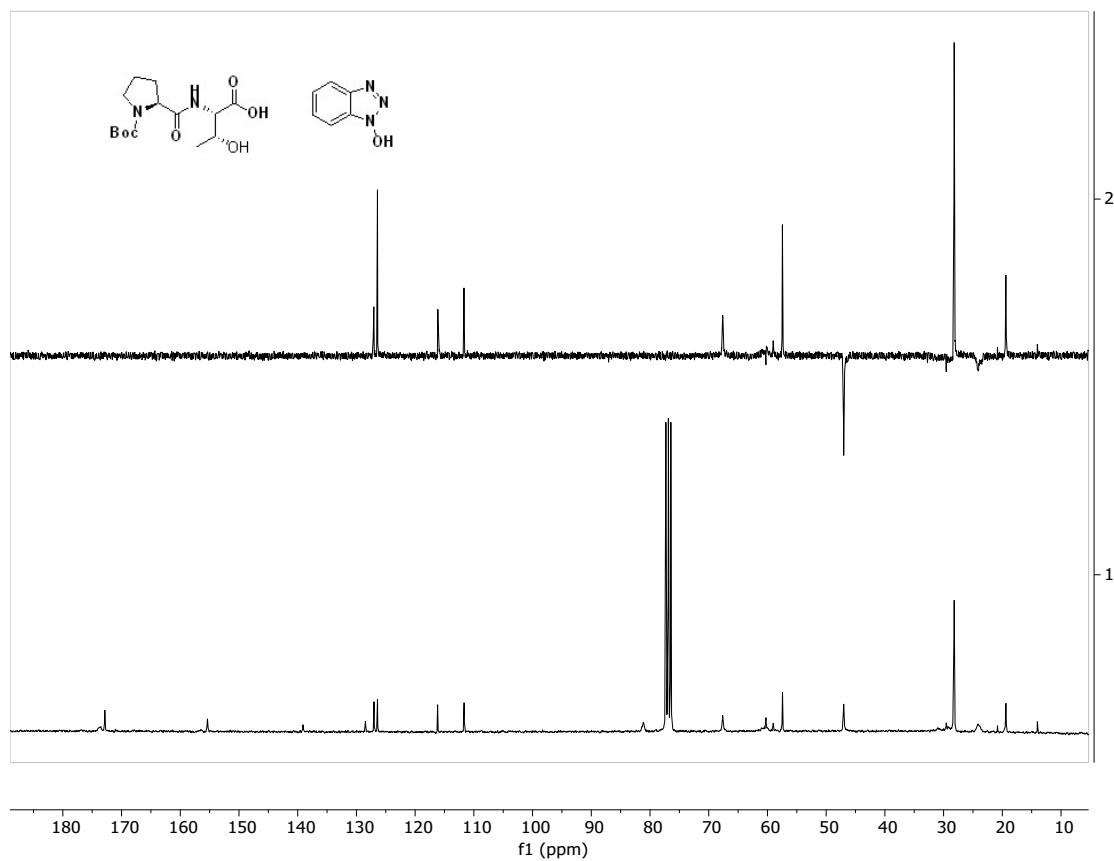

**<sup>13</sup>C and DEPT NMR of 11 + HOBt**

Supporting Information

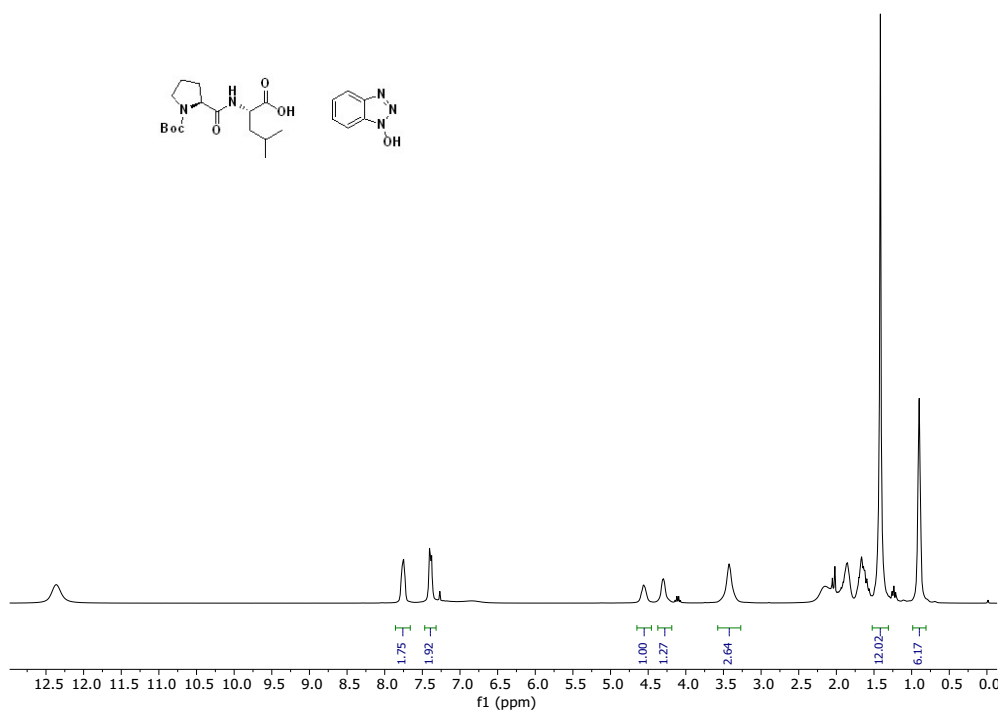

<sup>1</sup>H NMR of 12 + HOBt

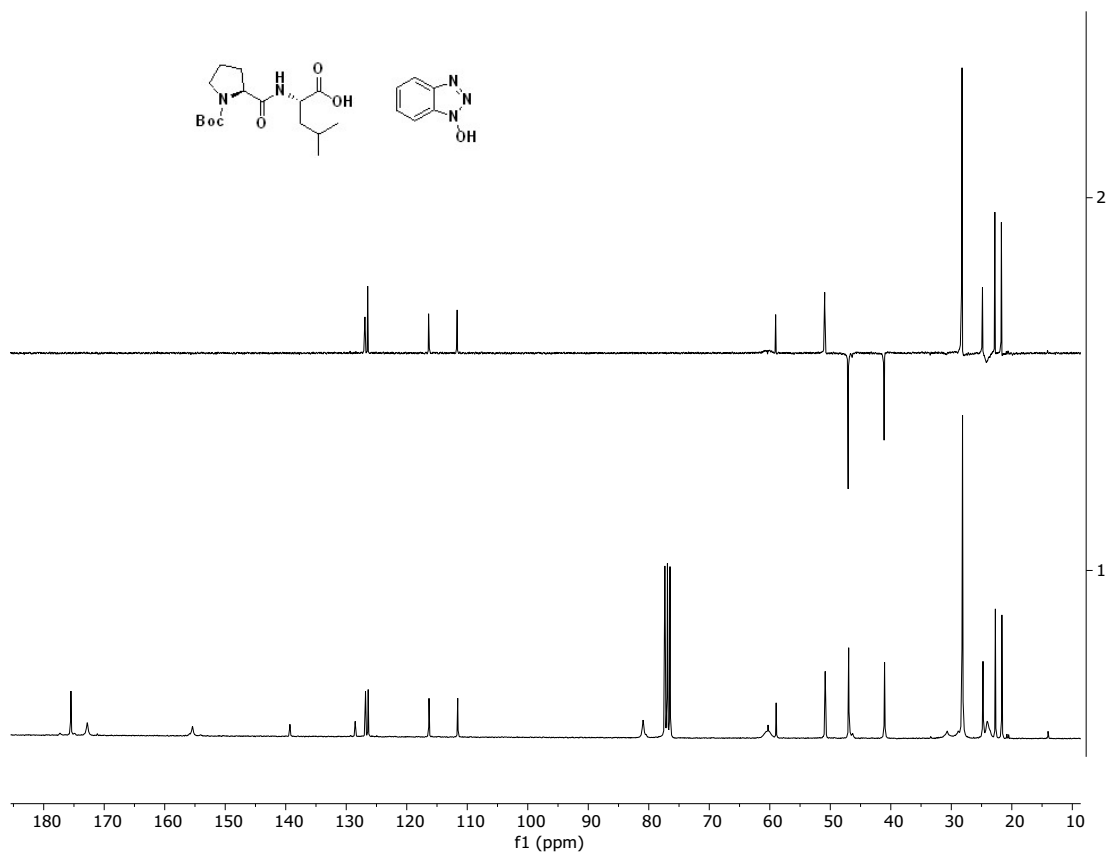

<sup>13</sup>C and DEPT NMR of 12 + HOBt



# Supporting Information

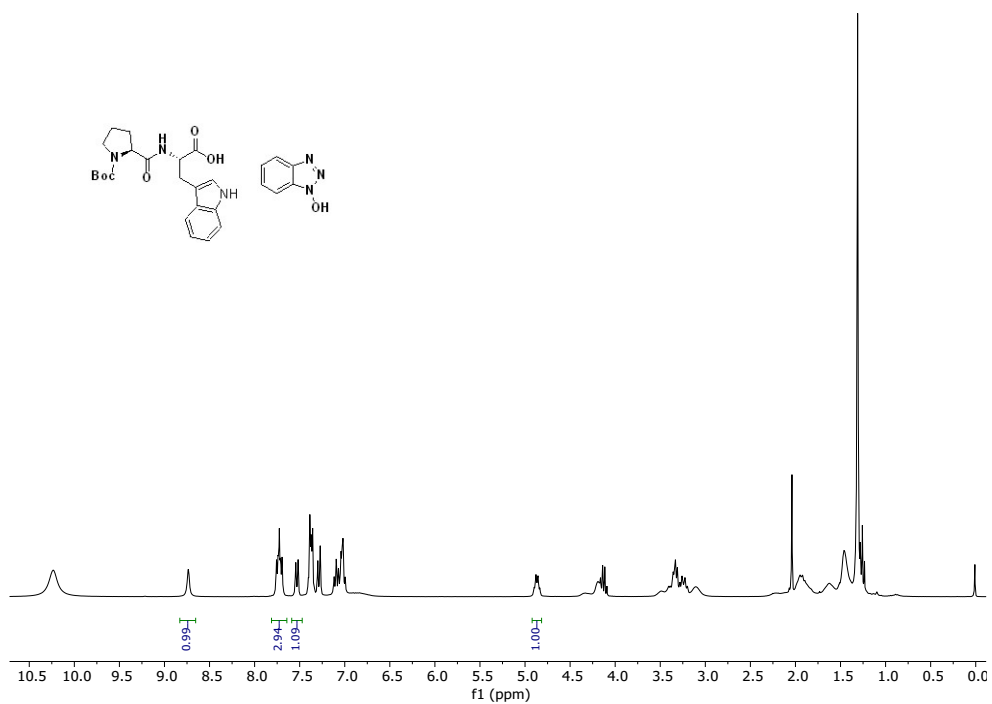

<sup>1</sup>H NMR of 13 + HOBt

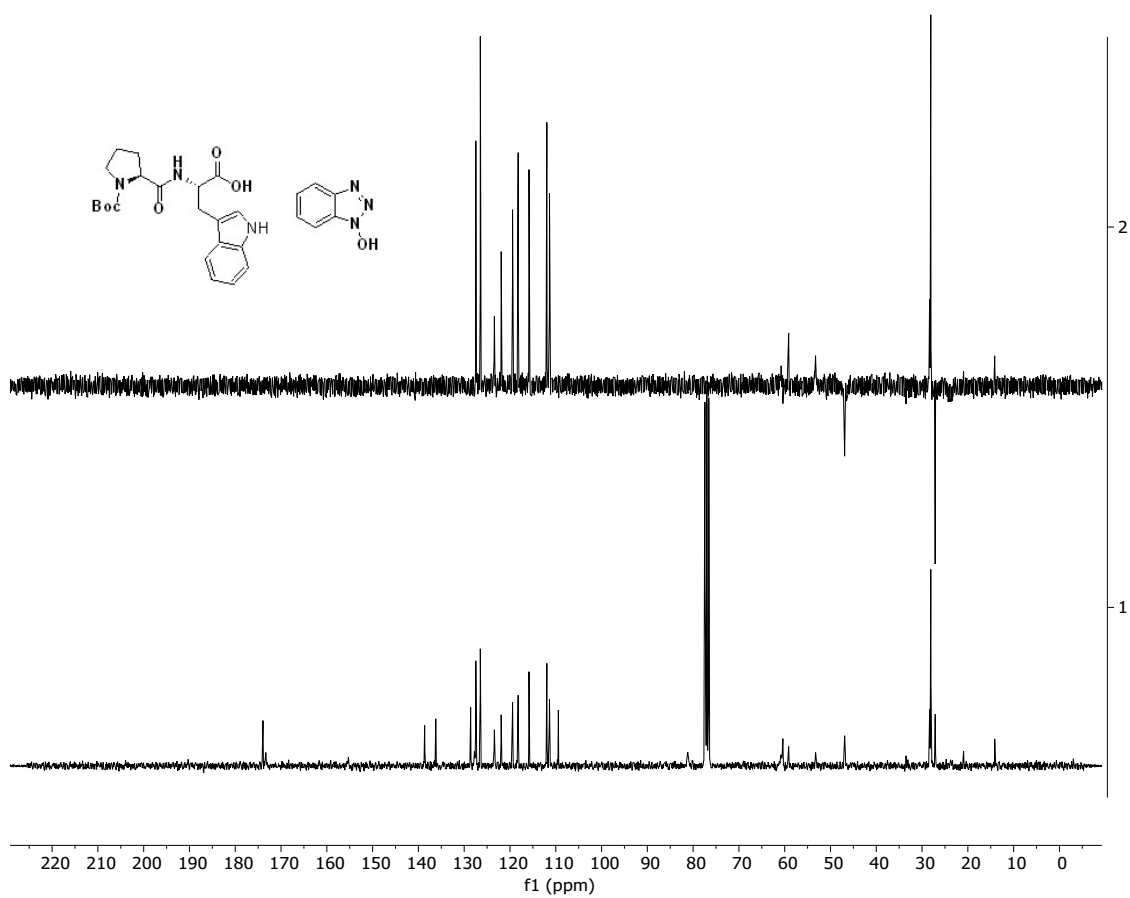

<sup>13</sup>C and DEPT NMR of 13 + HOBt

## 3. NMR spectrum of intermediates 18, 20, 21 and 22

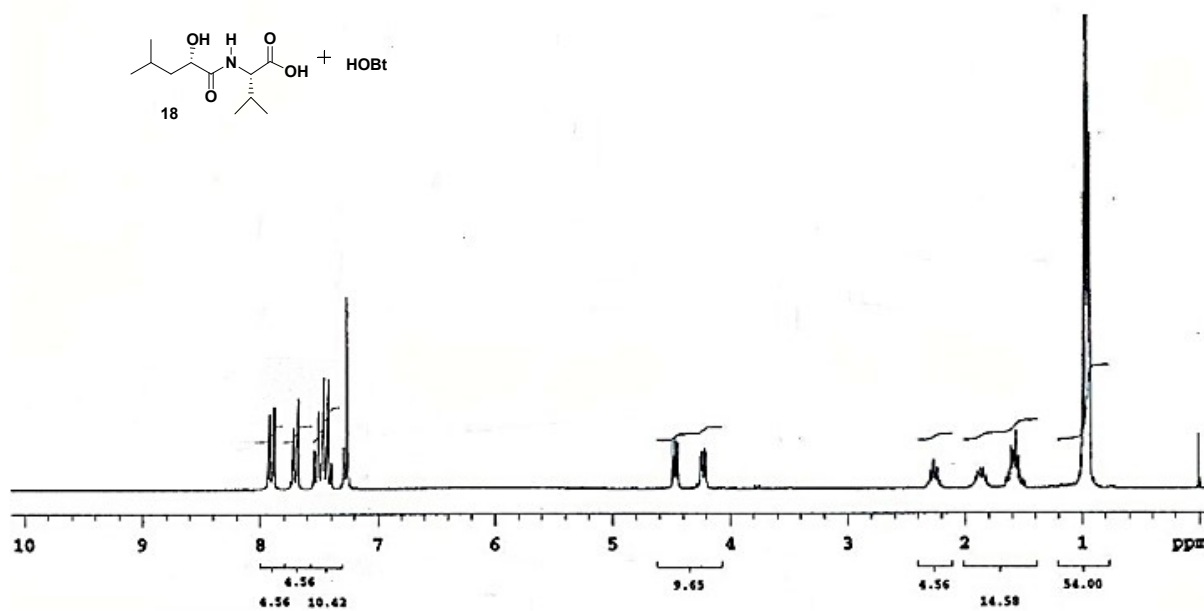 $^1\text{H}$  NMR of 18 + HOBT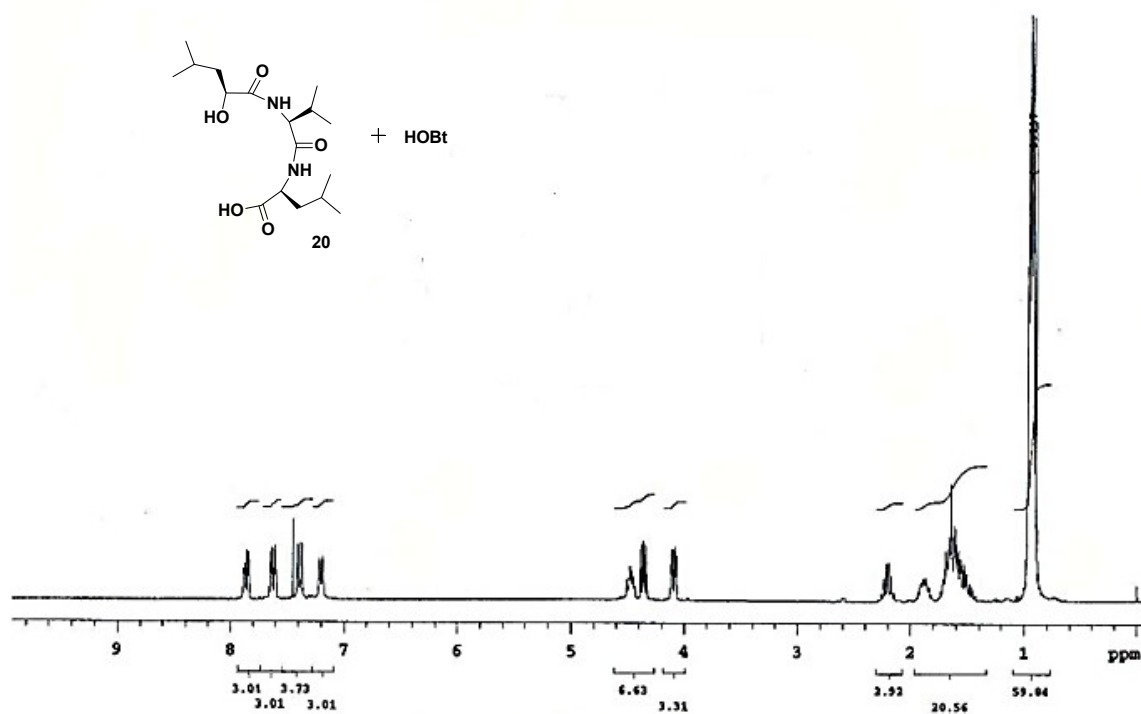 $^1\text{H}$  NMR of 20 + HOBT

Supporting Information

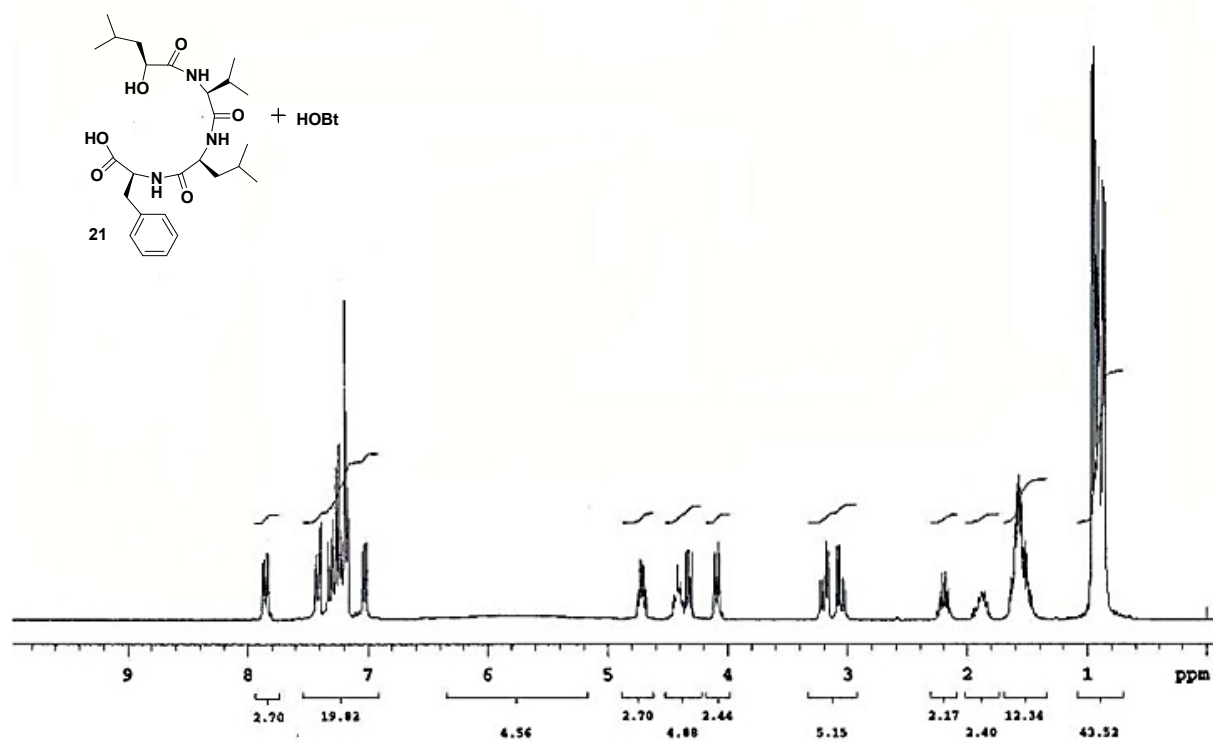

<sup>1</sup>H NMR of 21 + HOBt

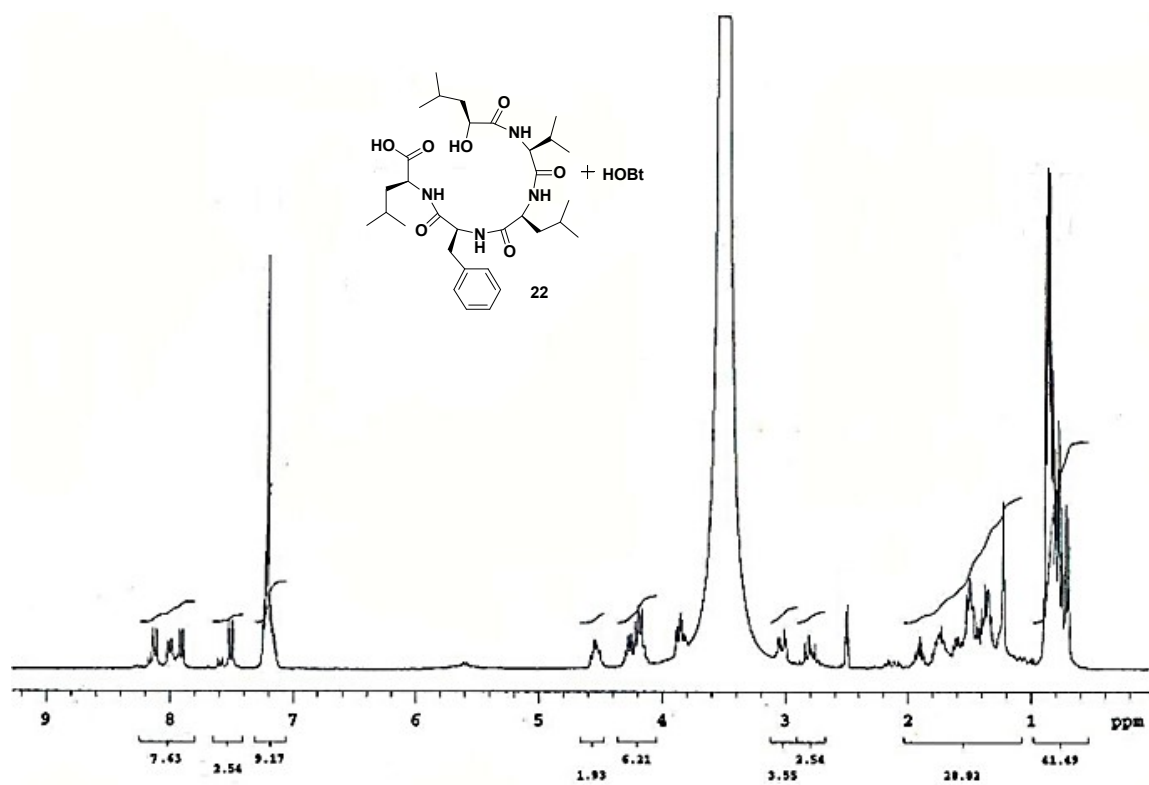

<sup>1</sup>H NMR of 22 + HOBt

## 4. NMR Spectrum of Sansalvamide A

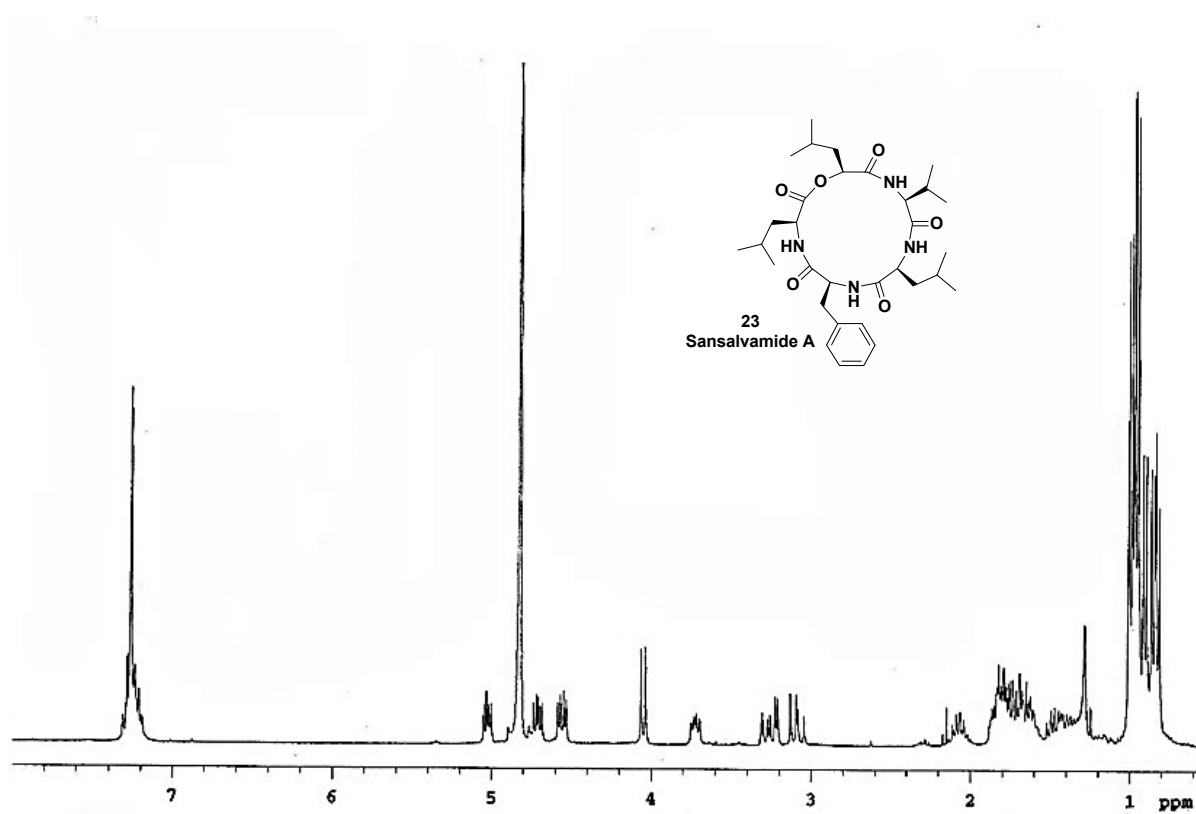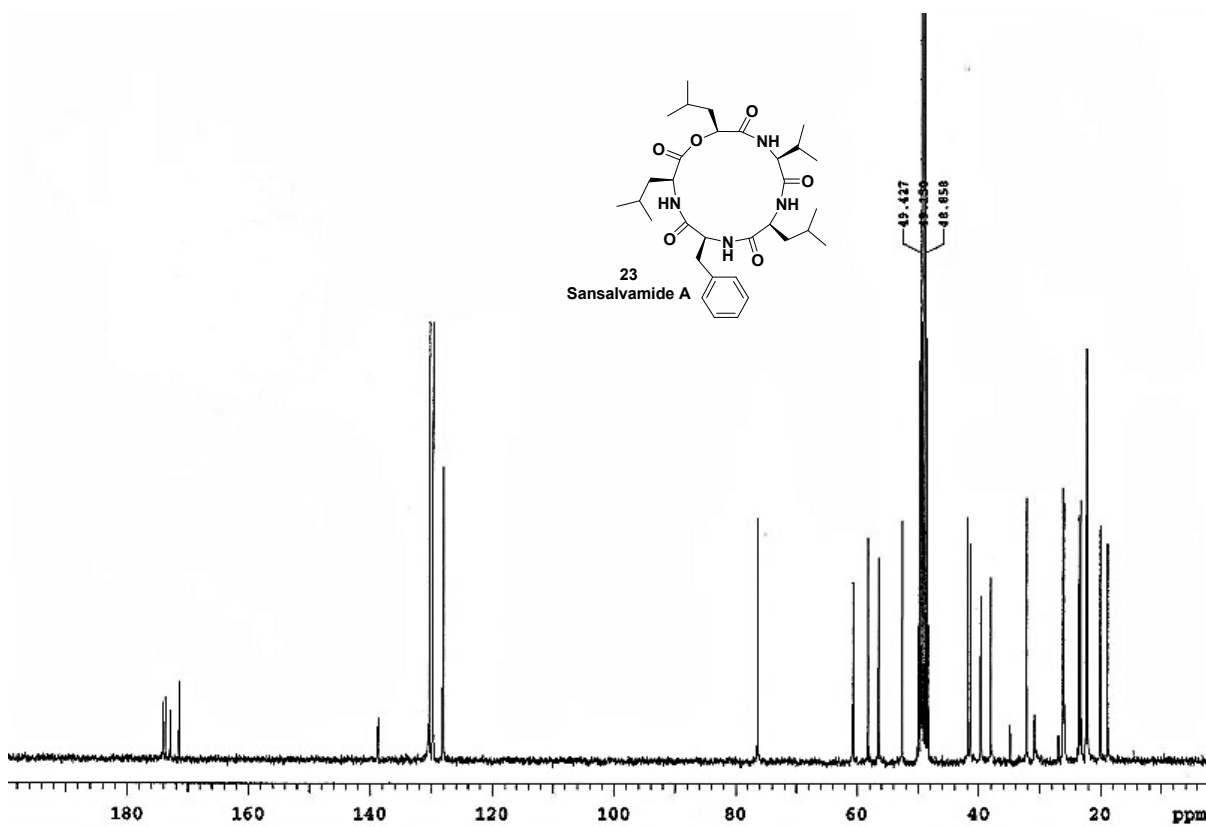

## 5. ESI-Mass of Sansalvamide A

Calculated for  $C_{32}H_{51}O_6N_4$  587.3809, found 587.5

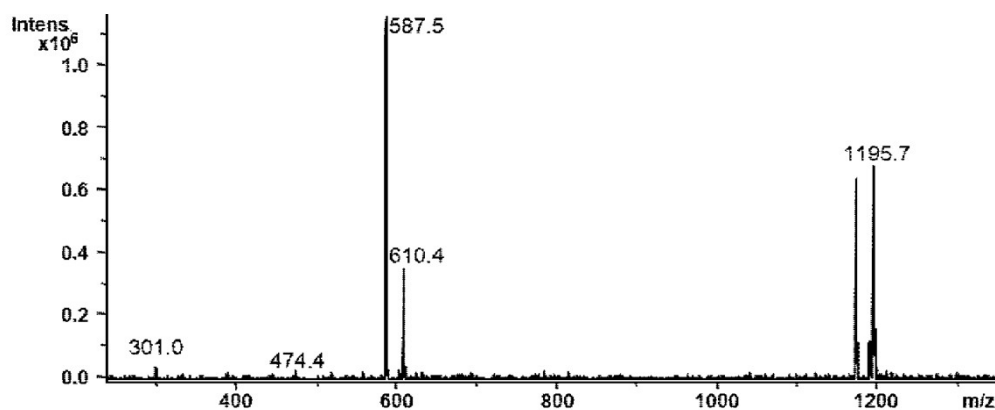

## 6. HPLC of Sansalvamide A

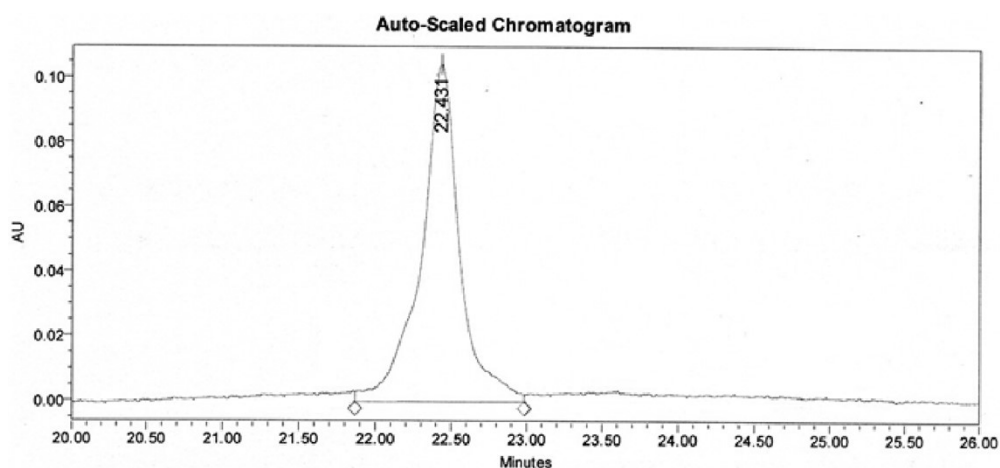

## 7. References

- <sup>1</sup> G. K. Min, D. Hernández, A. T. Lindhardt and T. Skrydstrup, *Org. Lett.*, 2010, **12**, 4716–4719.
- <sup>2</sup> F. Li, K. Bravo-Rodriguez, Ch. Phillips, R. W. Seidel, F. Wieberneit, R. Stoll, N. L. Doltsinis, E. Sanchez-Garcia and W. Sander, *J. Phys. Chem. B*, 2013, **117**, 3560–3570.
- <sup>3</sup> A. Zhang and Y. Guo, *Chem. Eur. J.*, 2008, **14**, 8939–8946.
- <sup>4</sup> M. El Khatib, M. Elagawany, E. Çalışkan, E. F. Davis, H. M. Faidallah, S. A. El-feky and A. R. Katritzky, *Chem. Commun.*, 2013, **49**, 2631–2633.
